# Supplementary material
Source: publisher figshare collection journal article supplement (https://tandf.figshare.com/ndownloader/files/12466952)
Supplement: Supplementary file 1 [file 12466952]

Dr. Daniel J. Klionsky

Editor-in-chief

Autophagy

August 29, y

Dear Dr. Klionsky：

Attached please find the second revision of our manuscript entitled “Novel insight into circular RNA *HECTD1* in astrocyte activation via autophagy by targeting *MIR142*-TIPARP: Implications for cerebral ischemic stroke” for consideration for publication in ***Autophagy*.**

We would like to take this opportunity to thank the editor for the effort on our manuscript. According to the edited version from the editor, we have made the necessary revision in the text and figures. We have added the [instrument](javascript:void(0);) details and reagent catalog number except the customized products obtained from biotechnology company, such as *circHECTD1* peobe, *MIR142* probe and 3'-biotinylated miRNAs *et al*. We also confirmed the description of all the control group. We now submitted the revised version of the manuscript in order to conform to the style of ***Autophagy***.

We look forward to a favorable response.

Sincerely,

Yao honghong Ph.D

Vice Dean, Chair and Professor

Department of Pharmacology

School of Medicine, Southeast University

Dingjiaqiao 87, Nanjing, Jiangsu, China 210009

Tel: +86 25 83272551

E-mail: yaohh@seu.edu.cn
